# Supplementary material
Source: HighWire-hosted journal article supplement (http://cmajopen.ca/highwire/filestream/80894/field_highwire_adjunct_files/0/open-2016-0009-1-at.pdf)
Supplement: open-2016-0009-1-at.pdf [file open-2016-0009-1-at.pdf]

## Appendix 1 (as supplied by the authors): Databases and definitions used.

**Table e1:** The Institute for Clinical Evaluative Sciences databases used in this study and their descriptions

| Database                                                                                         | Description                                                                                                                        |
|--------------------------------------------------------------------------------------------------|------------------------------------------------------------------------------------------------------------------------------------|
| Ontario Health Insurance Plan (OHIP)                                                             | Contains claims data paid for by the Ontario Health Insurance Plan for most healthcare professionals in the province               |
| Canadian Institute for Health Information Discharge Abstract Database (CIHI-DAD)                 | Contains patient-level data for acute, chronic, and day surgery institutions in Ontario                                            |
| Canadian Institute for Health Information National Ambulatory Care Reporting System (CIHI-NACRS) | Contains patient visits to hospital and community based ambulatory care: day surgery, outpatient clinics and emergency departments |
| Canadian Institute for Health Information Same Day Surgery (CIHI-SDS)                            | Contains patient-level data for day surgery institutions in Ontario                                                                |
| Canadian Organ Replacement Register (CORR)                                                       | Contains activity and outcomes of vital organ transplantation and renal dialysis for donors and recipients treated in Ontario      |
| Ontario Renal Reporting System (ORRS)                                                            | Contains data on patients with chronic kidney disease and renal dialysis                                                           |
| Ontario Diabetes Database (ODD)                                                                  | Contains all incident cases of diabetes in Ontario                                                                                 |
| Ontario Cancer Registry (OCR)                                                                    | Contains Ontario residents newly diagnosed, or died, with cancer (except non-melanoma skin cancers)                                |
| Ontario Myocardial Infarction Database (OMID)                                                    | Contains hospitalized patients with first acute myocardial infarction                                                              |
| Chronic Obstructive Pulmonary Disease (COPD)                                                     | Contains all Ontario patients with COPD                                                                                            |
| Ontario Drug Benefit (ODB)                                                                       | Contains claims for prescription drugs received under the ODB program (most are for those $\geq 65$ years of age)                  |
| Ontario Congestive Heart Failure (CHF) Database                                                  | Contains all Ontario individuals identified as having CHF                                                                          |
| Ontario Human Immunodeficiency Virus (HIV) database                                              | Contains all Ontario HIV positive patients                                                                                         |
| Ontario Hypertension Database (HYPER)                                                            | Contains all Ontario individuals identified as having hypertension.                                                                |

**Table e2:** Databases and codes used to define medical conditions

| Medical Condition | Definition                  |
|-------------------|-----------------------------|
| Hypertension      | Hypertension was defined as |

Appendix to: Schwartz KL, Jembere N, Campitelli MA, et al. Using physician billing claims from the Ontario Health Insurance Plan to determine individual influenza vaccination status: an updated validation study. *CMAJ Open* 2016. DOI: 10.9778/cmajo.20160009. Copyright © 2016 The Author(s) or their employer(s).

To receive this resource in an accessible format, please contact us at [cmajgroup@cmaj.ca](mailto:cmajgroup@cmaj.ca).

| Medical Condition                            | Definition                                                                                                                                                                                                                                                                                                                                                                                                                                             |
|----------------------------------------------|--------------------------------------------------------------------------------------------------------------------------------------------------------------------------------------------------------------------------------------------------------------------------------------------------------------------------------------------------------------------------------------------------------------------------------------------------------|
|                                              | <p>a) one hospital admission with a hypertension diagnosis, or<br/> b) an OHIP claim with a hypertension diagnosis followed within two years by either an OHIP claim or a hospital admission with a hypertension diagnosis.(1)</p> <p><u>CIHI-DAD, CIHI-SDS</u><br/> ICD-9 diagnostic codes: 401, 402, 403 404, 405<br/> ICD-10 diagnostic codes: I10, I11, I12, I13, I15</p> <p><u>OHIP</u><br/> OHIP diagnostic codes: 401, 402, 403 404, or 405</p> |
| Asthma                                       | <p>Asthma database was used to identify patients with asthma, based on 2 or more ambulatory care visits and/or 1 or more hospitalizations.(2)</p> <p><u>OHIP</u><br/> OHIP diagnostic code: 493</p> <p><u>CIHI-DAD</u><br/> ICD-9 diagnostic code: 493<br/> ICD-10 diagnostic codes: J45, J46</p>                                                                                                                                                      |
| Diabetes                                     | <p>ODD was used to identify patients with diabetes, based on 2 OHIP diagnostic codes or 1 OHIP service code or 1 CIHI admission within 2 years.(3)</p> <p><u>OHIP</u><br/> OHIP diagnostic code: 250<br/> OHIP service codes: Q040, K029, K030, K045, K046</p> <p><u>CIHI-DAD, CIHI-SDS</u><br/> ICD-9 diagnostic code: 250<br/> ICD-10 diagnostic codes: E10, E11, E13, E14</p>                                                                       |
| Cancer                                       | <p>OCR was used to identify patients with a history of cancer diagnosed in Ontario except for non-melanoma skin cancer.(4)</p>                                                                                                                                                                                                                                                                                                                         |
| Chronic obstructive pulmonary disease (COPD) | <p>COPD database was used to identify patients with COPD, based on 3 or more ambulatory care visits and/or 1 or more hospitalizations within 2 years.(5)</p> <p><u>OHIP</u><br/> OHIP diagnostic codes: 491, 492, 496</p>                                                                                                                                                                                                                              |

| Medical Condition                        | Definition                                                                                                                                                                                                                                                                                                                                                                                                                                                                                                                                                                                                                                                                                                                                             |
|------------------------------------------|--------------------------------------------------------------------------------------------------------------------------------------------------------------------------------------------------------------------------------------------------------------------------------------------------------------------------------------------------------------------------------------------------------------------------------------------------------------------------------------------------------------------------------------------------------------------------------------------------------------------------------------------------------------------------------------------------------------------------------------------------------|
|                                          | <p><u>CIHI-DAD</u><br/>           ICD-9 diagnostic codes: 491, 492, 496<br/>           ICD-10 diagnostic codes: J41, J42, J43, J44</p>                                                                                                                                                                                                                                                                                                                                                                                                                                                                                                                                                                                                                 |
| <p>Congestive heart failure (CHF)</p>    | <p>CHF database was used to identify patients with CHF, based on 1 CIHI NACRS, CIHI-DAD, CIHI-SDS, or OHIP claim and a second claim (from either) in 1 year.(6)</p> <p><u>OHIP</u><br/>           OHIP diagnostic code: 428</p> <p><u>CIHI-DAD, CIHI-SDS</u><br/>           ICD-9 diagnostic code: 428<br/>           ICD-10 diagnostic codes: I500, I501, I509</p>                                                                                                                                                                                                                                                                                                                                                                                    |
| <p>Acute myocardial infarction (AMI)</p> | <p>OMID was used to identify patients with a history of AMI using OHIP, CIHI-DAD, and CIHI-SDS.(7)</p> <p><u>OHIP:</u><br/>           OHIP service codes: C132, C133, C134, C135, C136, C137, C139, C435, C602, C603, C604, C605, C606, C607, C609, C675, C002, C003, C004, C005, C006, C007, C009, C905, G297, G557, G558, G559, G400, G401, G402, G405, G406, G407, R742, R743, Z434, Z442.</p> <p><u>CIHI-DAD, CIHI-SDS</u><br/>           CCI procedure codes: 3IS10, 3IP10, 2HZ28, 1IJ50, 1IJ57, or 1IJ76<br/>           CCP procedure codes: 4802, 4803, 4809, 4892, 4893, 4894, 4895, 4896, 4897, 4898, 4996, or 4997<br/>           ICD-9 diagnostic codes: 410, 411, 413, or 428<br/>           ICD-10 diagnostic codes: I21, I50, or I20</p> |
| <p>Chronic kidney disease (CKD)</p>      | <p>Identifying patients with CKD.(8)</p> <p><u>OHIP</u><br/>           OHIP diagnostic codes: 403, 585</p> <p><u>CIHI NACRS, CIHI-DAD</u><br/>           ICD-10 diagnostic codes: E102, E112, E132, E142, I12, I13, N08, N18, N19</p> <hr/> <p>Identifying patients on chronic dialysis(9)</p> <p>At least 2 of any of the following codes in OHIP, CIHI-DAD, or</p>                                                                                                                                                                                                                                                                                                                                                                                   |

| Medical Condition | Definition                                                                                                                                                                                                                                                                                                                                                                                                                                                                                                                                                                                                                                                                                                                                                                                                                                                                                                                                                                                                                                                                                                                                                                                                                                                                                                                                                                                                                                                                                                                                                                                                                                                                                                                                                       |
|-------------------|------------------------------------------------------------------------------------------------------------------------------------------------------------------------------------------------------------------------------------------------------------------------------------------------------------------------------------------------------------------------------------------------------------------------------------------------------------------------------------------------------------------------------------------------------------------------------------------------------------------------------------------------------------------------------------------------------------------------------------------------------------------------------------------------------------------------------------------------------------------------------------------------------------------------------------------------------------------------------------------------------------------------------------------------------------------------------------------------------------------------------------------------------------------------------------------------------------------------------------------------------------------------------------------------------------------------------------------------------------------------------------------------------------------------------------------------------------------------------------------------------------------------------------------------------------------------------------------------------------------------------------------------------------------------------------------------------------------------------------------------------------------|
|                   | <p data-bbox="505 233 1308 268">CIHI-SDS separated by at least 90 days, but less than 150 days</p> <p data-bbox="505 306 581 342"><u>OHIP</u></p> <p data-bbox="505 342 1365 485">OHIP service codes: R849, G323, G325, G326, G860, G862, G865, G863, G866, G330, G331, G332, G333, G861, G082, G083, G085, G090, G091, G092, G093, G094, G095, G096, G294, G295, G864, H540, H740</p> <p data-bbox="505 525 800 560"><u>CIHI-DAD, CIHI-SDS</u></p> <p data-bbox="505 560 935 596">CCI procedure codes: 5195, 6698</p> <p data-bbox="505 596 867 632">CCP procedure code: 1PZ21</p> <p data-bbox="505 672 594 707"><u>CORR</u></p> <p data-bbox="505 707 1365 814">Treatment codes: 060, 111, 112, 113, 121, 122, 123, 131, 132, 133, 141, 151, 152, 211, 221, 231, 241, 242, 251, 252, 311, 312, 313, 321, 322, 323, 331, 332, 333, 413, 423, 433, 443, 453</p> <p data-bbox="505 854 589 890"><u>ORRS</u></p> <p data-bbox="505 890 846 926">Patients included in ORRS</p> <hr/> <p data-bbox="505 966 756 1001"><b>Exclusion criteria:</b></p> <p data-bbox="505 1001 964 1037">Patients with kidney transplants(10)</p> <p data-bbox="505 1077 581 1113"><u>OHIP</u></p> <p data-bbox="505 1113 922 1148">OHIP service codes: S435, S434</p> <p data-bbox="505 1188 649 1224"><u>CIHI DAD</u></p> <p data-bbox="505 1224 849 1260">CCP procedure code: 6759</p> <p data-bbox="505 1260 865 1295">CCI procedure code: 1PC85</p> <p data-bbox="505 1335 594 1371"><u>CORR</u></p> <p data-bbox="505 1371 1377 1440">Treatment code: 171 plus one or more of Transplanted Organ Codes (1-3): 10, 11, 12, 18, 19</p> <p data-bbox="505 1480 589 1516"><u>ORRS</u></p> <p data-bbox="505 1516 1166 1551">Type of event during patient care: Transplanted (tx)</p> |
| Stroke            | <p data-bbox="505 1589 1365 1696">CIHI-DAD was used to identify patients with a history of acute ischemic stroke, based on at least one hospitalization with the most responsible diagnosis coded with one of the following codes (11):</p> <p data-bbox="505 1736 800 1772"><u>CIHI-DAD, CIHI-SDS</u></p> <p data-bbox="553 1772 984 1808">ICD-9 diagnostic codes: 434, 436</p> <p data-bbox="553 1808 1325 1843">ICD-10 diagnostic codes: I63 (excluding 163.6), I64, H34.1</p>                                                                                                                                                                                                                                                                                                                                                                                                                                                                                                                                                                                                                                                                                                                                                                                                                                                                                                                                                                                                                                                                                                                                                                                                                                                                                |

| Medical Condition | Definition                                                                                                                                                                                                                                                                                                                                                                                                                                                                                                                                                                                                                                                                                                                                                                                                                                                                                                                                                                                                                                                                 |
|-------------------|----------------------------------------------------------------------------------------------------------------------------------------------------------------------------------------------------------------------------------------------------------------------------------------------------------------------------------------------------------------------------------------------------------------------------------------------------------------------------------------------------------------------------------------------------------------------------------------------------------------------------------------------------------------------------------------------------------------------------------------------------------------------------------------------------------------------------------------------------------------------------------------------------------------------------------------------------------------------------------------------------------------------------------------------------------------------------|
| Immunosuppression | <p data-bbox="505 233 1365 302">ACG macro was used to identify patients in OHIP, CIHI-NACRS, and CIHI-DAD(12) with any mention of immune system disorders.</p> <p data-bbox="505 344 1328 413">In addition, the following databases and definitions were used to identify patients with immunosuppression:</p> <p data-bbox="505 455 574 485"><u>ODB</u></p> <p data-bbox="505 491 1349 596">30 days of oral corticosteroids in the past 6 months, antineoplastic use in the past 6 months, or use of another immunocompromising drug in the past 6 months</p> <p data-bbox="505 638 670 667"><u>CORRLINK</u></p> <p data-bbox="505 674 1352 779">CORRLINK is a dataset in ICES which links CORR and CIHI-DAD data. This database only includes patients that have received an organ transplant and does not include dialysis patients.</p> <p data-bbox="505 821 565 850"><u>HIV</u></p> <p data-bbox="505 856 1382 961">HIV database was used to identify patients with HIV, based on 3 physician claims in 3 years with OHIP diagnostic codes: 042, 043 or 044.(13)</p> |
| Dementia          | <p data-bbox="505 1003 1352 1108">1 hospitalization for dementia or 3 ambulatory visits for dementia, each separated by at least 30 days, within 2 years or 1 prescription from ODB.(14)</p> <p data-bbox="505 1150 581 1180"><u>OHIP</u></p> <p data-bbox="505 1186 927 1215">OHIP diagnostic codes: 290, 331</p> <p data-bbox="505 1257 802 1287"><u>CIHI-DAD, CIHI-SDS</u></p> <p data-bbox="505 1293 1276 1323">ICD-9 diagnostic codes: 0461, 290, 294, 331.0, 331.1, 331.5</p> <p data-bbox="505 1329 1157 1358">ICD-10 diagnostic codes: F00, F01, F02, F03, G30</p> <p data-bbox="505 1400 574 1430"><u>ODB</u></p> <p data-bbox="505 1436 1057 1465">1 prescription for a cholinesterase inhibitor</p>                                                                                                                                                                                                                                                                                                                                                             |

CCI= Canadian Classification of Health Interventions, CCP=Canadian Classification of Procedures, ACG=Adjusted Clinical Groups®

## **References:**

1. Tu K, Campbell NR, Chen ZL, Cauch-Dudek KJ, McAlister FA. Accuracy of administrative databases in identifying patients with hypertension. *Open Med* 2007;1(1):e18-e26.
2. Gershon AS, Wang C, Guan J, Vasilevska-Ristovska J, Cicutto L, To T. Identifying patients with physician-diagnosed asthma in health administrative databases. *Can Respir J* 2009 Nov;16(6):183-8.
- 3.. Hux JE, Ivis F, Flintoft V, Bica A. Diabetes in Ontario: determination of prevalence and incidence using a validated administrative data algorithm. *Diabetes Care* 2002 Mar;25(3):512-6.
4. Hall S, Schulze K, Groome P, Mackillop W, Holowaty E. Using cancer registry data for survival studies: the example of the Ontario Cancer Registry. *J Clin Epidemiol* 2006 Jan;59(1):67-76.
5. Gershon AS, Wang C, Guan J, Vasilevska-Ristovska J, Cicutto L, To T. Identifying individuals with physician diagnosed COPD in health administrative databases. *COPD* 2009 Oct;6(5):388-94.
6. Schultz SE, Rothwell DM, Chen Z, Tu K. Identifying cases of congestive heart failure from administrative data: a validation study using primary care patient records. *Chronic Dis Inj Can* 2013 Jun;33(3):160-6.
7. Austin PC, Daly PA, Tu JV. A multicenter study of the coding accuracy of hospital discharge administrative data for patients admitted to cardiac care units in Ontario. *Am Heart J* 2002 Aug;144(2):290-6.
8. Fleet JL, Dixon SN, Shariff SZ, Quinn RR, Nash DM, Harel Z, et al. Detecting chronic kidney disease in population-based administrative databases using an algorithm of hospital encounter and physician claim codes. *BMC Nephrol* 2013;14:81.
9. Quinn RR, Laupacis A, Austin PC, Hux JE, Garg AX, Hemmelgarn BR, et al. Using administrative datasets to study outcomes in dialysis patients: a validation study. *Med Care* 2010 Aug;48(8):745-50.
10. Lam NN, McArthur E, Kim SJ, Knoll GA. Validation of kidney transplantation using administrative data. *Can J Kidney Health Dis* 2015;2:20.
11. The Canadian Stroke Strategy. Canadian Stroke Strategy Core Performance Indicator Update 2010. The Canadian Stroke Strategy 2010 [Accessed 2016 Aug 9];Available from: URL: [http://strokebestpractices.ca/wp-content/uploads/2010/12/Stroke\\_Core\\_ENG.pdf](http://strokebestpractices.ca/wp-content/uploads/2010/12/Stroke_Core_ENG.pdf)

12. Starfield B, Weiner J, Mumford L, Steinwachs D. Ambulatory care groups: a categorization of diagnoses for research and management. *Health Serv Res* 1991 Apr;26(1):53-74.
13. Antoniou T, Zagorski B, Loutfy MR, Strike C, Glazier RH. Validation of case-finding algorithms derived from administrative data for identifying adults living with human immunodeficiency virus infection. *PLoS One* 2011;6(6):e21748.
14. Jaakkimainen RL, Bronskill SE, Tierney MC, Hermann N, Green D, Young J, et al. Identification of physician-diagnosed Alzheimer's disease and related dementias in population-based administrative data: a validation study using family physicians' electronic medical records. *J Alzheimers Dis* 2016; (In press).
